# Supplementary material for: Role of NRP1 in Bladder Cancer Pathogenesis and Progression
Source: Front Oncol. 2021 Jun 23;11:685980. doi: 10.3389/fonc.2021.685980 (PMC8261128; doi:10.3389/fonc.2021.685980)
Supplement: Supplementary file 11 [file Table_8.xlsx]

## Sheet: Sheet
Supplementary Table 8 | Molecular interaction network analysis by IPA®. IPA® uses a network generation algorithm to segment the molecules interaction network into multiple networks and each network was sorted by score value.
Molecules in Network	Score	Focus Molecules	Top Diseases and Functions
ATAD2, ATP1B1, ATPase, C11orf58, CYB5B, DNAJA1, DYRK2, F2R, FDFT1, G-Actin, HLA-B, HLA-DPB1, HLA-F, HOXA1, HSPA5, HSPE1, KIAA1467, KIF14, KIF1B, KIF20B, MHC, MSRB3, NAP1L1, NCEH1, PDCD6IP, PRKAB2, RGS20, RNF213, SERPINB5, SLC44A1, SNRPA1, STAMBPL1, TRIP6, VMA21, ZBTB1	40	32	Cancer, Organismal Injury and Abnormalities, Cell Cycle
ABCC9, ALOX5AP, ANK2, B4GAT1, BRI3BP, C15orf48, CDKN1C, CPD, CRISPLD2, DDX5, DNA-methyltransferase, DNMT3B, EPC2, EPM2AIP1, EXOG, EZH2, FEN1, Focal adhesion kinase, GC-GCR dimer, LIG3, MBNL1, NCAPD2, NCAPG, PARP1, Pias, PLEKHA6, PRTFDC1, RRP1B, SMC4, SRSF3, TDG, TEP1, TOP2A, WSB2, WTAP	38	31	DNA Replication, Recombination, and Repair, Cellular Assembly and Organization, Cell Cycle
ARID3B, BICC1, BLOC1S1, BRK1, CCDC50, CD109, CHMP3, DCBLD2, DDX60, DFNA5, DSC2, DSG2, EGFR, Erbb1 dimer, F3-F7, Flotillin, KIAA1524, KIF2A, LRIG1, LRIG3, MCOLN3, NEURL1, PKC alpha/beta, plasminogen activator, RIN2, RIOK1, ROR1, SERPINE2, SH2D3A, SH3BGRL, SH3RF2, SNX4, TBC1D1, TPP1, XPO4	36	30	Cellular Function and Maintenance, Skeletal and Muscular System Development and Function, Tissue Development
ABLIM3, ANXA8/ANXA8L1, ARHGAP19, ARID5B, ARL4A, ATP9A, CLEC2D, DTX4, FILIP1L, FNDC3B, GALM, GCC2, GRHL1, HAPLN3, HNMT, Inhibin, MALAT1, MBOAT2, NEGR1, PARP3, PDGF-CC, PGRMC2, RDH11, SCCPDH, Smad1/5/8, SPAG4, SRM, ST3GAL5, TAGLN, TGFB1, Timp, TWIST, Type II Receptor, UCA1, ZFP36L2	34	29	Cellular Development, Organismal Injury and Abnormalities, Renal and Urological Disease
APPBP2, CA2, CSTF3, DDX21, DOT1L, EID3, EIF5A2, ELL2, EMC1, farnesyl transferase, histone-lysine N-methyltransferase, HP1BP3, Igh (family), KMT2E, LAMTOR1, MLLT3, NUS1, P-TEFb, PAPOLA, PKC (α, β, γ, δ, ε, ι), PLCB1, POU2F2, Ras, RBBP6, RPS23, RRAGA, RRAGB, RRAGD, SLC16A7, SNX5, SUN2, SYNE2, TMBIM4, UPP1, WHSC1	34	29	Cellular Assembly and Organization, Cellular Function and Maintenance, Nucleic Acid Metabolism
CDK19, CHD3, CPE, CYP1A1, DAZAP2, ERRFI1, FAM20C, FAM46B, glutathione transferase, GSTK1, GSTM3, HSD17B11, KRT17, LRPPRC, MECP2, MED31, MYL12B, NFIA, NFIB, NMU, Nuclear factor 1, PI3K p85, QKI, RFC5, SFXN1, SRC (family), TFIIA, thyroid hormone receptor, TIMM23, TOM1L1, TOR1AIP2, TSC22D1, UBASH3B, USMG5, VEPH1	34	29	Organismal Functions, Nervous System Development and Function, Organ Morphology
Ampa Receptor, BBC3, BIRC3, CASP1, CASP2, CASP4, caspase, Caspase 3/7, CCP110, DUB, GAL, GBP3, GLUL, GPCPD1, HERPUD1, IFI16, IGSF3, IL11, Inflammasome (Nalp1, Asc, Casp1, Casp4), LIF, LIFR, NFKBIA, NPTN, P2RX4, PIR, potassium channel, PSD4, PYCARD, SORL1, SORT1, TNFSF10, UACA, USP33, USP48, USP9X	32	29	Cell Death and Survival, Cellular Compromise, Renal Necrosis/Cell Death
ACVR2B, ADIPOR2, AGPAT9, BAMBI, BMP4, Bmpr1, BMPR2, Collagen Alpha1, CYB5R4, cyclooxygenase, DLX2, FST, GRSF1, HIC2, INHBA, Insulin, KLF10, NFIL3, NREP, PDGFB, PEG10, Proinsulin, PURB, RIMS2, sGC, SLC25A12, Smad, SMAD1, SMAD7, Smad2/3, SQLE, TGFB2, TGFBR2, TGFBR3, TWF1	30	27	Connective Tissue Development and Function, Skeletal and Muscular System Development and Function, Tissue Development
60S ribosomal subunit, AGO1, Angiotensin II receptor type 1, BARD1, BRCA1-BARD1, C14orf142, CCNB1, CDH2, CFAP45, FMR1, H2AFX, INADL, KLHL15, LCN2, MDC1, MEOX1, NABP2, NMDA Receptor, NPM1, NRG (family), p70 S6k, PDZD11, PPP2CA, PRKAA1, RASD1, RNA polymerase II, RNASE4, RNase A, RPL10, RPL22, RPL31, RPL13A, SLAIN2, SLFN11, SSX2IP	29	27	Cell Morphology, Cellular Development, Nervous System Development and Function
26s Proteasome, AHR, BBX, C11orf70, CALM1 (includes others), CBFB, CUL3, CUL4B, CYBRD1, DENND3, DNAJB6, FBXO9, Fgf, GJA1, GNRH, HISTONE, Hsp70, JOSD1, KBTBD4, KCTD18, KDELC1, KLHL28, LGMN, MCCC1, MDM2, MTORC1, NEDD4L, OGT, PRDM8, RUNX2, SGK1, SOD1, STAG1, TBRG1, TRIM4	29	29	Cell Cycle, Protein Degradation, Protein Synthesis
B4GALT1, BHLHE41, CCNE2, DDAH1, DEK, E2f, E2F8, ERBB, ERO1L, Hat, HBE1, HDAC8, Hdac1/2, HELLS, HEXIM1, HIST1H4C, histone deacetylase, HK2, HOXB7, KIF15, MICB, MKI67, MSRA, NR2F2, PMP22, PVR, SAP30, Sin3A Complex, SLC19A2, SMIM3, TEAD4, TH2 Cytokine, thymidine kinase, TK2, Vegf	27	26	Gene Expression, Organismal Survival, Embryonic Development
CAPRIN1, CCDC53, chymotrypsin, creatine kinase, DECR1, DLGAP4, Dynamin, DYSF, ENaC, Endophilin, ERLIN2, EVI2A, FBN1, FN1, GPIIB-IIIA, H2AFV, HFE, IREB2, LONP2, MAT2A, MAT2B, N-type Calcium Channel, Na+, K+ -ATPase, PCM1, PP1 protein complex group, RAB11A, RIMS1, SNAP25, STX3, STX6, Syntaxin, TFRC, TMEM50B, VAMP4, ZNF23	26	25	Cell-To-Cell Signaling and Interaction, Cellular Function and Maintenance, Molecular Transport
ACOT2, Alpha catenin, BTBD7, COL4A1, COL6A1, COLEC10, collagen, Collagen type I, Collagen(s), CTGF, CXCL5, DKK1, FER, IL6R, Il8r, JAG1, LRP, LSS, MMP9, MSMO1, NPPB, Pdgf Ab, PDGF BB, PDGF-AA, PLAT, SCARB1, SERPINE1, SERPINH1, SGTB, SPARC, Tgf beta, THBS1, TMEM45A, TNC, ZNF277	26	25	Cardiovascular System Development and Function, Organismal Development, Dermatological Diseases and Conditions
ABCC3, ANXA1, Cbp/p300, COL1A1, Cpla2, CPT1, CPT1A, CROT, estrogen receptor, KIAA1377, LARP6, MKX, N-cor, NEK6, Nr1h, NR3C2, PDGFA, PRKAA, PTGS2, SAT1, SERPINB8, SIN3A, SNAI2, SOX9, sphingomyelinase, SSPN, STAU2, TMEFF1, trypsin, TSC22D3, UGT, UGT8, UGT2B7, VDR, VGLL3	26	25	Developmental Disorder, Endocrine System Disorders, Connective Tissue Development and Function
3 beta HSD, CD276, DDX58, DHX58, GBP1, HSD17B14, Icam, IFIT1, IFIT2, IFIT3, IFIT5, IFN alpha/beta, IFN type 1, IFNAR1, IL28, IL20RB, IRF, IRF1, IRF9, ISGF3, MHC Class I (complex), NR2E3, PBK, PREX1, RARRES3, RCN2, RELA, RNF135, SNAPC1, SNAPC3, STAT2, Stat1-Stat2, TAPBPL, TLR3, TRIM38	26	26	Infectious Disease, Antimicrobial Response, Inflammatory Response
ADIRF, AMMECR1, APC/APC2, BACH1, Bcl9-Cbp/p300-Ctnnb1-Lef/Tcf, C4BP, CK1, Ctbp, CTNNβ-TCF/LEF, DST, FAM83D, FBXL16, Glycogen synthase, GOLGA3, GSK3B, JUP, Kallikrein, KANK2, KIAA1191, LEF1, MAPRE1, MOB1A, NIN, NLK, PDE4DIP, PPP6C, PROS1, SERPINA5, SLC1A5, SLC26A2, TCF, TCF/LEF, TIMELESS, UBXN6, ZSCAN26	25	25	Cancer, Gastrointestinal Disease, Hepatic System Disease
CCL20, CYLD, CYP1B1, CYP2J2, CYP2U1, DCP2, FBXO3, GFPT1, HARS, I kappa b kinase, Ikb, IKK (complex), INTS7, KIAA0930, KIF11, MAP3K14, MTORC2, NFkB (family), NfkB1-RelA, OTUB2, PELI1, POLD2, POLD3, Ras homolog, RHEB, RLIM, TBC1D7, Tnf receptor, TNFAIP3, TNFRSF1B, TRAF4, Ubiquitin, unspecific monooxygenase, USP11, USP13	25	25	Post-Translational Modification, Cellular Movement, Hematological System Development and Function
ACAT2, ADRA1, APC (complex), APOBEC3A, ARHGAP1, ARHGAP26, ARHGAP35, CKAP2, CTH, DDIT4, ETV1, HDL-cholesterol, HIF1AN, HMG CoA synthase, HMGCS1, IFRD1, INSIG1, LDL-cholesterol, LIPG, Mapk, PDP1, Plk, RECK, RhoGap, RND1, SCD, SIRPB1, SOAT1, Srebp, STARD4, TRIB1, TRIB3, UBIQUITIN LIGASE, VLDL-cholesterol, ZC3H14	25	24	Lipid Metabolism, Small Molecule Biochemistry, Vitamin and Mineral Metabolism
alcohol group acceptor phosphotransferase, BRWD1, CAK, Casein, Cdk, CDK4, CDK6, CDKN2C, CIRBP, Cyclin A, Cyclin B, Cyclin D, Cyclin E, DHFR, E2F5, EBI3, ENDOD1, EPCAM, FBXO4, MCM7, MFSD6, Mmp, MNS1, PAX8, PIM1, PRPF4B, PTBP3, Rb, RPA, SCG5, SERPINB2, SKP2, ZMYM3, ZNF219, ZNF367	25	24	Cell Cycle, Renal and Urological System Development and Function, Cancer
Akt, ATMIN, CCDC88A, CDK4/6, Collagen type VI, CYP19, death receptor, ECSCR, Foxo, FUT4, GALNT2, GPSM3, GSPT1, INPP4B, LETM1, NMB, PAIP1, PDGF (family), PID1, PLEKHA2, SCD5, SEMA7A, SIGLEC15, SLC39A10, SRSF5, UBE2, Ube3, UBE2B, UBE2F, UBE2L6, UBE3B, UBR5, Vdac, Vegf Receptor, WBSCR22	24	24	Developmental Disorder, Hereditary Disorder, Neurological Disease
BID, CD3, CD44, CDK2, chemokine, CRNKL1, CSF3, DHRS1, DHRS4, DICER1, ELK3, ETS1, Gcn5l, Histone h3, Histone h4, ID3, IGF2BP3, KIAA0895, MME, MNX1, NANOS1, NNT, NRG1, ODC1, ORAI3, PANK3, PRKCA, PRKCE, Rock, SPATS2L, SUSD6, TCEAL3, TM4SF18, TMEM54, ZNF33B	23	29	Cancer, Organismal Injury and Abnormalities, Cellular Development
ANTXR1, APH1A, ARG2, Atf, ATM/ATR, BMP, CTPS1, cytochrome C, DNM1L, DTX3L, EIF4A, Eif4g, Gli, HIGD1A, Hsp27, IFI27, IVNS1ABP, MEST, MFF, NCBP1, PARN, PARP, PARP9, PDCD6, Pka, PLSCR3, PPP1R9A, RAB32, RRM2, Secretase gamma, SRI, TRIB2, WLS, Wnt, ZC3HAV1	23	23	Cell Cycle, Cellular Assembly and Organization, RNA Damage and Repair
Alpha Actinin, Alpha tubulin, ATP5L, ATXN3, Beta Tubulin, CENPA, CENPN, CENPU, Collagen type III, Collagen type XVIII, Dynein, EFEMP1, EHD1, EML1, Gamma tubulin, GDA, Gαq, hexokinase, HLA Class I, IFN alpha receptor, IGF1R, MX1, PHF23, PRKCDBP, PRSS23, RACGAP1, RSF1, SNAPIN, ST7, TRAPPC4, TUBB2A, TUBB2B, TUBB4B, tubulin (complex), ZNRF1	23	23	Cancer, Hematological Disease, Immunological Disease
7S NGF, AGPS, AGTPBP1, Ahr-Arnt, Ahr-aryl hydrocarbon-Arnt, aldehyde dehydrogenase (NAD), ALDH, ALDH1A3, ALDH3A2, ALDH9A1, Ap2 alpha, ARID3A, ATP2C1, ATP6V0E1, BLMH, CPOX, endothelin receptor, FEZ2, FOS, FSTL1, GST, ICMT, INTERLEUKIN, LETMD1, MGST1, Mir122a, b, Na-k-atpase, NFATC2IP, ornithine decarboxylase, REEP5, Sos, TET1, TGFBI, TIPARP, TSPAN2	21	22	Cancer, Connective Tissue Disorders, Organismal Injury and Abnormalities
ADAM10, ADAM12, ADAMTS1, ALAD, CHD7, Collagen type IV, Collagen Type XI, CYR61, DPYD, Growth hormone, Gsk3, Igf, IGF2, Igfbp, IGFBP3, IGFBP4, IGFBP6, LRP5, Mac1, MMP1, MMP10, N-Cadherin, NuRD, PAPPA, POLE4, secreted MMP, SKA2, Smad2/3-Smad4, SPC24, STAT1/3/5 dimer, TFPI2, TIMP2, TSPAN14, VitaminD3-VDR-RXR, ZWINT	21	22	Post-Translational Modification, Protein Degradation, Protein Synthesis
