# Supplementary material for: Role of NRP1 in Bladder Cancer Pathogenesis and Progression
Source: Front Oncol. 2021 Jun 23;11:685980. doi: 10.3389/fonc.2021.685980 (PMC8261128; doi:10.3389/fonc.2021.685980)
Supplement: Supplementary file 14 [file Table_11.xlsx]

## Sheet: Sheet1
Supplementary Table 11. The most significantly enriched signaling pathways enriched in phenotype of high and low expression of NRP1 in BC cell lines.
Pathway annotation	ES	NES	NOM p-val	FDR q-val
Pathways significantly enriched in phenotype of high expression of NRP1 in BC cell lines（12 samples）
Focal Adhesion	0.400637	1.37557	0.0268595	1
Melanoma	0.420468	1.34113	0.043659	1
GAP Junction	0.389673	1.34129	0.0473251	1
Pathways significantly enriched in phenotype of low expression of NRP1 in BC cell lines （13 samples）
Ether Lipid Metabolism	-0.640011	-1.65099	0.002	0.445065
Linoleic Acid Metabolism	-0.697719	-1.58763	0.0040568	0.323142
Steroid Hormone Biosynthesis	-0.603211	-1.62273	0.0116732	0.332526
Leukocyte Transendothelial Migration	-0.38662	-1.36837	0.0142602	1
Alpha Linolenic Acid Metabolism	-0.727206	-1.54132	0.0232068	0.398949
PPAR Signaling Pathway	-0.440686	-1.35155	0.0408163	0.895935
Aldosterone Regulated Sodium Reabsorption	-0.471437	-1.35869	0.0431211	0.978753
ES: enrichment score; NES: normalized enrichment score; NOM: nominal; FDR: false discovery rate.
Gene sets with NOM p-val are considered as significant.
