# Supplementary material for: Role of NRP1 in Bladder Cancer Pathogenesis and Progression
Source: Front Oncol. 2021 Jun 23;11:685980. doi: 10.3389/fonc.2021.685980 (PMC8261128; doi:10.3389/fonc.2021.685980)
Supplement: Supplementary file 15 [file Table_12.xlsx]

## Sheet: Sheet1
Supplementary Table 12 | 63 pairs of interacting lncRNAs and miRNAs, and 4 pairs of interacting NRP1 and miRNAs were identified.
The miRNAs related to NRP1 were predicted in TargetScan. After selecting the miRNAs with differently regulated trends for both NRP1 and lncRNAs using data extracted from TCGA-bladder cancer database, a ceRNA network was obtained, including 38 lncRNAs and 4 miRNAs.
lncRNA			miRNA			mRNA
Sybmol	Log2 FC	Category	Sybmol	Log2 FC	Category	Symbol	Category
C2orf48	2.28899	Up-regulated	hsa-miR-143	-3.51872	Down-regulated	NRP1	Up-regulated
C15orf54	1.48873	Up-regulated				NRP1
C20orf197	3.2373	Up-regulated				NRP1
LINC00518	4.33218	Up-regulated				NRP1
C11orf72	1.27763	Up-regulated
LINC00482	2.19134	Up-regulated
LINC00313	1.2884	Up-regulated
LINC00221	5.85636	Up-regulated
C9orf163	2.36525	Up-regulated
AC009093.1	1.1302	Up-regulated
LINC00336	2.0152	Up-regulated
LINC00487	2.64897	Up-regulated
AL391152.1	1.4517	Up-regulated
AC133041.1	2.59519	Up-regulated
LINC00460	7.0655	Up-regulated
C21orf91-OT1	1.95888	Up-regulated
AL139002.1	4.54667	Up-regulated
AC011453.1	4.1176	Up-regulated
PVT1	1.21096	Up-regulated
LINC00261	4.50029	Up-regulated
LINC00518	4.33218	Up-regulated	hsa-miR-145	-2.12564	Down-regulated	NRP1	Up-regulated
LINC00336	2.0152	Up-regulated			Down-regulated
AC016773.1	1.75921	Up-regulated			Down-regulated
SMCR2	1.03765	Up-regulated			Down-regulated
LINC00337	2.02709	Up-regulated			Down-regulated
DSCR9	1.40754	Up-regulated			Down-regulated
ERVH48-1	6.15272	Up-regulated			Down-regulated
C21orf91-OT1	1.95888	Up-regulated			Down-regulated
MIR210HG	1.29349	Up-regulated			Down-regulated
PVT1	1.21096	Up-regulated			Down-regulated
LINC00520	3.81837	Up-regulated			Down-regulated
LINC00261	4.50029	Up-regulated			Down-regulated
C2orf48	2.28899	Up-regulated	hsa-miR-195	-2.40535	Down-regulated	NRP1	Up-regulated
C15orf54	1.48873	Up-regulated			Down-regulated
LINC00313	1.2884	Up-regulated			Down-regulated
C9orf163	2.36525	Up-regulated			Down-regulated
AC009093.1	1.1302	Up-regulated			Down-regulated
AC016773.1	1.75921	Up-regulated			Down-regulated
C7orf71	2.5993	Up-regulated			Down-regulated
LINC00355	2.46545	Up-regulated			Down-regulated
AC112721.1	5.6721	Up-regulated			Down-regulated
AC004895.1	1.02471	Up-regulated			Down-regulated
MIR210HG	1.29349	Up-regulated			Down-regulated
PVT1	1.21096	Up-regulated			Down-regulated
LINC00536	3.65421	Up-regulated			Down-regulated
AC128709.1	2.04126	Up-regulated			Down-regulated
LINC00520	3.81837	Up-regulated			Down-regulated
C2orf48	2.28899	Up-regulated	hsa-miR-204	-1.49043	Down-regulated	NRP1	Up-regulated
LINC00518	4.33218	Up-regulated			Down-regulated
C11orf72	1.27763	Up-regulated			Down-regulated
LINC00313	1.2884	Up-regulated			Down-regulated
LINC00221	5.85636	Up-regulated			Down-regulated
LINC00501	1.6692	Up-regulated			Down-regulated
LINC00487	2.64897	Up-regulated			Down-regulated
AC011481.1	1.51504	Up-regulated			Down-regulated
SMCR2	1.03765	Up-regulated			Down-regulated
ERVMER61-1	4.46088	Up-regulated			Down-regulated
AC005035.1	3.26804	Up-regulated			Down-regulated
LINC00536	3.65421	Up-regulated			Down-regulated
AC128709.1	2.04126	Up-regulated			Down-regulated
HULC	1.44085	Up-regulated			Down-regulated
LINC00520	3.81837	Up-regulated			Down-regulated
LINC00261	4.50029	Up-regulated			Down-regulated
